1 **Synergistic effects of cardiovascular health and social isolation on adverse pregnancy**  
2 **outcomes**

3 Hisashi Ohseto, MD,<sup>1</sup> Mami Ishikuro, PhD,<sup>1,2</sup> Geng Chen, MMSc,<sup>1</sup> Ippei Takahashi, MMSc,<sup>1</sup>  
4 Genki Shinoda, MS,<sup>1,2</sup> Aoi Noda, PhD,<sup>1,2,3</sup> Keiko Murakami, MPH, PhD,<sup>2</sup> Masatsugu Orui,  
5 MD, PhD,<sup>1,2</sup> Noriyuki Iwama, MD, PhD,<sup>1,2,3</sup> Masahiro Kikuya, MD, PhD,<sup>2,4</sup> Hirohito Metoki,  
6 MD, PhD,<sup>2,5</sup> Atsushi Hozawa, MD, PhD,<sup>1,2</sup> Taku Obara, PhD,<sup>1,2,3</sup> Shinichi Kuriyama, MD,  
7 PhD<sup>1,2,6</sup>

8 <sup>1</sup>Graduate School of Medicine, Tohoku University, Sendai, Miyagi, Japan.

9 <sup>2</sup>Tohoku Medical Megabank Organization, Tohoku University, Sendai, Miyagi, Japan

10 <sup>3</sup>Tohoku University Hospital, Tohoku University, Sendai, Miyagi, Japan

11 <sup>4</sup>Graduate School of Medicine, Teikyo University, Itabashi-ku, Tokyo, Japan

12 <sup>5</sup>Graduate School of Medicine, Tohoku Medical and Pharmaceutical University, Sendai,  
13 Miyagi, Japan

14 <sup>6</sup>International Research Institute of Disaster Science, Tohoku University, Sendai, Miyagi,  
15 Japan

16 **Conflicts of Interest**

17 K. M. is an employee of the Ministry of Education, Culture, Sports, Science and Technology,  
18 Japan.

19 **Source of Funding**

20 This work was supported by the Japan Agency for Medical Research and Development  
21 (AMED), Japan (Grant Nos. JP19gk0110039, JP17km0105001, JP21tm0124005, and  
22 JP21tm0424601), Japanese Society for the Promotion of Science KAKENHI (Grant No.  
23 JP21K10438), and The Seiichi Imai Memorial Foundation (2023).

**NOTE: This preprint reports new research that has not been certified by peer review and should not be used to guide clinical practice.**

24 **Paper presentation information**

25 This work has not been previously presented anywhere.

26 **Disclaimer**

27 None.

28 **Corresponding author**

29 Mami Ishikuro, PhD

30 2-1, Seiryomachi, Aoba-ku, Sendai, Miyagi 980-8573, Japan

31 Phone: +81-22-717-8104

32 E-mail: [mami.ishikuro.e5@tohoku.ac.jp](mailto:mami.ishikuro.e5@tohoku.ac.jp)

33 **Word count of Abstract:** 350 words

34 **Word count of main text (not including title, abstract, acknowledgment, references,**  
35 **tables, and figure legends):** 2,997 words

36

37

38 **Tweetable Statement**

39 Cardiovascular health impacts pregnancy outcomes. Social isolation exacerbates these risks.

40 Improving cardiovascular health, particularly in socially isolated women, is crucial to

41 reducing health disparities.

42

43 **Short Title:** Cardiovascular health and adverse pregnancy outcomes

44

45 **AJOG at a Glance**

46 **Why was this study conducted?**

- 47 • Adverse pregnancy outcomes affect approximately 20% pregnant women and are  
48 increasing. We hypothesized that preventive strategies employed for cardiovascular  
49 diseases can be applied to adverse pregnancy outcomes.

50 **What are the key findings?**

- 51 • Pregnant women with low cardiovascular health status had an increased risk of  
52 adverse pregnancy outcomes, preeclampsia, gestational diabetes mellitus, preterm  
53 birth, large for gestational age, and neonatal intensive care unit admission.
- 54 • In addition, socially isolated pregnant women were more affected by low  
55 cardiovascular health status and faced a greater risk of adverse pregnancy outcomes.

56 **What does this study add to what is already known?**

- 57 • Improving cardiovascular health during pregnancy, especially for socially isolated  
58 women, is necessary to minimize health disparities.

59

## Abstract

**Background:** Adverse pregnancy outcomes affect approximately 20% pregnant women, and their incidence is increasing.

**Objective:** To investigate the effect of cardiovascular health during pregnancy on adverse pregnancy outcomes and the effect modification by psychological distress, social isolation, and income.

**Study Design:** We analyzed data from 14,930 pregnant women in the Tohoku Medical Megabank Project Birth and Three-Generation Cohort Study. Cardiovascular health status during pregnancy was assessed using the eight components of Life's Essential 8 as proposed by the American Heart Association, including diet, physical activity, nicotine exposure, sleep health, body mass index, blood lipids, blood glucose, and blood pressure. Adverse pregnancy outcomes were defined as composite outcomes of preeclampsia, gestational diabetes mellitus, preterm birth, and small for gestational age. Using logistic regression analyses, we examined the associations between cardiovascular health and adverse pregnancy outcomes, preeclampsia, gestational diabetes mellitus, preterm birth, small for gestational age, large for gestational age, low birth weight, and neonatal intensive care unit admission. Interactions with psychological distress, social isolation, and income were examined.

**Results:** The numbers of participants with high, moderate, and low cardiovascular health status were 2,891 (19.4%), 11,498 (77.0%), and 541 (3.6%), respectively. Moderate and low cardiovascular health status were positively associated with adverse pregnancy outcomes (odds ratio and 95% confidence interval: 1.17 (1.04 to 1.32) and 2.64 (2.13 to 3.27), respectively). Low cardiovascular health status was also associated with a higher prevalence of preeclampsia, gestational diabetes mellitus, preterm birth, large for gestational age, and neonatal intensive care unit admission, and lower prevalence of small for gestational age. Among pregnant women with low cardiovascular health status, those who reported social

isolation had a higher prevalence of adverse pregnancy outcomes than did those without social isolation (36.4% vs. 27.4%). However, this difference was attenuated for pregnant women with high cardiovascular health status (13.6% vs. 13.1%).

**Conclusions:** Cardiovascular health status assessed using Life's Essential 8 may be useful for assessing the risk of adverse pregnancy outcomes. Socially isolated pregnant women are more vulnerable to the effects of low cardiovascular health status; thus, they should be prioritized for access to primary care, lifestyle education, and appropriate pharmacotherapy.

**Keywords** Cohort study, Gestational diabetes, Health disparities, Income, Life's Essential 8, Preeclampsia, Prenatal care, Preterm birth, Psychological distress, Small for gestational age

## 1 **Introduction**

2 Adverse pregnancy outcomes (APOs), which encompass unfavorable events or complications  
3 occurring during pregnancy, delivery, or postpartum, affect approximately 20% pregnant  
4 women and are increasing.<sup>1,2</sup> Following delivery, APOs can progress to cardiovascular  
5 disease (CVD)<sup>3-5</sup> and mortality.<sup>6</sup> Placental formation and cardiometabolic factors play crucial  
6 roles in APO development,<sup>7,8</sup> and their pathogenic similarity to CVDs has led to the  
7 characterization of pregnancy as a “stress test for CVD.”<sup>9</sup> Risk factors for APOs, such as  
8 obesity,<sup>10</sup> poor sleep quality,<sup>11</sup> and poor dietary habits<sup>12</sup> are also recognized as risk factors for  
9 CVD.<sup>13</sup> Therefore, it is expected that similar preventive strategies employed for CVD can be  
10 applied to APOs.

11 In 2022, Life’s Essential 8 (LE8) proposed by the American Heart Association,<sup>13</sup>  
12 which is an approach grounded in cardiovascular health (CVH) for disease prevention and  
13 health promotion. This concept emphasizes individual health while addressing existing CVD  
14 and associated risk factors. LE8 serves as an operational metric for CVH that includes eight  
15 components: diet, physical activity (PA), nicotine exposure, sleep health, body mass index  
16 (BMI), blood lipids, blood glucose, and blood pressure (BP). In contrast to Life’s Simple 7  
17 (LS7), a prior version of CVH metrics proposed in 2010,<sup>13</sup> sleep health was introduced as a  
18 new component in 2022, with all eight CVH components being rescaled to continuous  
19 variables. To date, over 2,500 studies have referenced original articles describing LS7,<sup>13</sup> and  
20 evidence on LE8 is growing.<sup>14,15</sup> A meta-analysis revealed associations between CVH, and  
21 CVD incidence, CVD mortality, and all-cause mortality.<sup>16</sup> Furthermore, these associations  
22 have been observed in adolescents and young adults.<sup>17</sup> Therefore, we hypothesized that LE8  
23 may be relevant in a wide range of APOs due to shared characteristics between CVD and  
24 APOs.

25 The integration of LE8 into antenatal care could enhance maternal health. Many

26 previous studies solely quantified the impact of a single component of CVH, neglecting its  
27 complex interconnections. LE8 provides a comprehensive overview of maternal CVH during  
28 pregnancy and is useful for assessment in clinical scenarios where a single factor (e.g.,  
29 smoking cessation) is related to others (e.g., weight gain or poor dietary habits).<sup>18</sup> To date, no  
30 study has investigated the relationship between LE8 during pregnancy and APOs. However,  
31 one study<sup>19</sup> exploring the link between LS7, earlier CVH metrics, and APOs demonstrated  
32 that improved CVH was associated with better pregnancy outcomes. Notably, this study  
33 utilized only five of seven components, and it remains unclear whether a comprehensive  
34 CVH assessment using LE8 is beneficial in antenatal care. Furthermore, the clinical  
35 significance of psychological health and the social determinants involved in effect  
36 modification cannot be overlooked. They have a solid clinical basis and underpin all the CVH  
37 metrics, interacting bidirectionally.<sup>13, 20, 21</sup> Previous research has revealed that poor CVH was  
38 related to depressive symptoms<sup>22, 23</sup> and social isolation.<sup>24</sup> Another study found an effect  
39 modification by CVH on the relationship between socioeconomic status and life  
40 expectancy.<sup>20</sup> To date, no study has investigated effect modification by psychological health  
41 and social determinants on the relationship between CVH and APOs.

42 In this study, we aim to investigate the effect of CVH assessed using LE8 on APOs  
43 in 14,930 pregnant Japanese women. We will also explore the effect modification by  
44 psychological distress, social isolation, and income.

45

## 46 **Materials and Methods**

### 47 **Participants**

48 Between 2013 and 2017, the Tohoku Medical Megabank Project Birth and Three-Generation  
49 (TMM BirThree) Cohort Study<sup>25, 26</sup> recruited 23,406 pregnant women from more than 50  
50 obstetric clinics and hospitals in Miyagi Prefecture, Japan. Participants who withdrew

51 consent (n=232), those with multiple births (n=313), those who delivered before or at 32  
52 weeks of gestation (n=223), those who had their blood samples drawn after 32 weeks of  
53 gestation (n=3,724), and those with missing data on delivery status (n=965) were excluded. A  
54 cutoff of 32 weeks of gestation was chosen to capture cardiovascular changes on transition  
55 from the second to the third trimester and to prevent pregnancy complications from affecting  
56 the CVH status. Additionally, this cutoff value aligned with those in previous studies.<sup>19, 27</sup>  
57 Participants that were involved in the TMM BirThree Cohort Study multiple number of times  
58 were identified, and only their first valid data were used in this study (n=620). Finally,  
59 participants with missing CVH metrics and covariates were excluded (n=3,391), leaving  
60 14,930 participants for the main analysis. The study flowchart is detailed in Supplementary  
61 Figure 1. Ethical approval was obtained from the Ethics Committee of the Tohoku Medical  
62 Megabank Organization (2013-1-103-1), and all participants provided written informed  
63 consent for study participation.

64

### 65 **CVH definitions**

66 Dietary quality was assessed using the 8-item Japanese Diet Index, which assesses adherence  
67 to the Japanese diet and is related to CVD mortality in the Japanese population.<sup>28, 29</sup> Food  
68 intake was estimated using a food frequency questionnaire.<sup>30</sup> PA, nicotine exposure, and sleep  
69 health were assessed during pregnancy using self-reported questionnaires. Pre-pregnancy  
70 BMI and BP before 20 weeks of gestation were obtained from medical records during  
71 antenatal care. Blood lipid and glucose levels before or at 32 weeks of gestation were  
72 determined from blood samples collected in the TMM BirThree Cohort Study.<sup>25</sup> Each LE8  
73 component was rated on a scale from 0 (least healthy) to 100 (most healthy), with detailed  
74 information provided in Supplementary Table 1. The overall CVH score was the unweighted  
75 average of all eight components.<sup>13</sup> Overall and component CVH scores were used to



76 categorize participants into three levels: high (80–100), moderate (50–79), and low (0–49), as  
77 outlined in the original article.<sup>13</sup>

78

## 79 **Outcomes**

80 APOs were defined as composite outcomes comprising preeclampsia (PE), gestational  
81 diabetes mellitus (GDM), preterm birth (PTB), and small for gestational age (SGA), based on  
82 their pathophysiological relevance to CVH and their clinical impact.<sup>5, 31</sup> A diagnosis of PE  
83 was established based on the American College of Obstetricians and Gynecologists  
84 guidelines,<sup>32</sup> utilizing medical records of antenatal care. GDM was identified from the  
85 medical records at delivery. To ascertain PTB and SGA, neonatal gestational age at delivery  
86 and birth weight were obtained from medical records at delivery. Additional neonatal  
87 outcomes, such as low birth weight (LBW), large for gestational age (LGA), and neonatal  
88 intensive care unit (NICU) admission, were identified from the medical records at delivery.

89

## 90 **Covariates**

91 Covariates included maternal age at conception ( $\geq 35$  years old or not), alcohol consumption  
92 during pregnancy, conception via in vitro fertilization (IVF), parity (primipara or not),  
93 psychological distress during pregnancy, social isolation during pregnancy, and household  
94 income ( $\leq 4$  million yen or not). Age at conception and parity were obtained from medical  
95 records during antenatal care, while the remaining variables were self-reported during  
96 pregnancy. Psychological distress was evaluated using the Kessler Psychological Distress  
97 Scale (K6),<sup>33</sup> comprising six items rated on a 5-point Likert scale. The total score ranged  
98 from 0 to 24, with a score of  $\geq 9$  indicating psychological distress. Social isolation was  
99 evaluated using the Lubben Social Network Scale (LSNS-6),<sup>34</sup> which consists of six items  
100 rated on a 6-point Likert scale. The total score ranged from 0 to 30, with a score of  $\leq 11$

101 indicating social isolation. In addition, the LSNS-6 has two subscales: family and friends.  
102 Each subscale score ranged from 0 to 15, and a score of  $\leq 5$  was considered social isolation  
103 (Supplementary Table 2).<sup>34</sup>

104

### 105 **Statistical analysis**

106 Baseline characteristics, CVH scores, and study outcomes were compared across the overall  
107 CVH levels and according to the APO status. Continuous variables were analyzed using  
108 analysis of variance or student's t-test, while categorical variables were analyzed using the  
109 chi-square test. Pearson's correlation coefficients were calculated for all combinations of  
110 component CVH scores.

111 The association between overall and component CVH levels and study outcomes  
112 was explored using multiple logistic regression analysis, employing high CVH levels as  
113 references and adjusting for covariates. Interactions between overall CVH levels and  
114 psychological distress, social isolation, and income levels were examined. Given that a  
115 significant interaction was observed with social isolation, further subgroup analyses were  
116 conducted for the subscales and each item of the LSNS-6 (Supplementary Table 2).

117 Sensitivity analyses were performed to assess the robustness of the results. First, due  
118 to some missing values not satisfying the "missing completely at random" assumption,<sup>35</sup> we  
119 conducted association analyses after imputing missing values in CVH metrics and covariates  
120 using multiple imputation by chain equations with five iterations<sup>36</sup> in a population of 18,321  
121 eligible participants. Second, to rule out the potential of reverse causality between CVH and  
122 APOs, association analyses were conducted solely on participants whose blood samples were  
123 collected before or at 20 weeks of gestation (Supplementary Figure 2). Third, we excluded  
124 participants with pre-pregnancy chronic hypertension (CH) (n=579) or pre-pregnancy  
125 diabetes mellitus (DM) (n=71) from the main analysis. This exclusion aimed to prevent an

126 overestimation of the effect of overall CVH on APOs, given the high risk of PE for patients  
127 with pre-pregnancy CH and the consequent diagnosis of GDM for those with pre-pregnancy  
128 DM.

129 A threshold p-value of  $<0.05$  was adopted for detecting statistical significance for the  
130 association analyses, while a significance level of  $P < 0.2$  was applied for the interaction  
131 term. All analyses were conducted using the R software version 4.1.2.

132

### 133 **Results**

134 Among the 14,930 study participants, 2,891 (19.4%), 11,498 (77.0%), and 541 (3.6%) had  
135 high, moderate, and low overall CVH levels, respectively (Table 1). Among participants with  
136 high, moderate, and low overall CVH levels, 380 (13.1%), 1,772 (15.4%), and 162 (29.9%),  
137 respectively, had APOs (Supplementary Table 3). Pregnant women with APOs had lower  
138 overall CVH scores as well as lower scores for nicotine exposure, sleep health, BMI, blood  
139 glucose, and BP (Supplementary Table 4). As shown in Supplementary Figure 3, CVH scores  
140 for individual components were observed to correlate positively with each other. However,  
141 significant negative correlations existed between PA and nicotine exposure, PA and sleep  
142 health, PA and BMI, and diet and blood glucose CVH scores.

143 In logistic regression analyses with adjustment (Table 2), moderate and low CVH  
144 levels were associated with APOs with odds ratios (OR) of 1.17 (95% CI: 1.04–1.32) and  
145 2.64 (95% CI: 2.13 to 3.27), respectively ( $P$  for trend  $< 0.001$ ). Low CVH levels were also  
146 associated with a higher prevalence of PE, GDM, PTB, LGA, and NICU admission and a  
147 lower prevalence of SGA. Using a heatmap, Figure 1 shows the results of logistic regression  
148 analyses with adjustments between eight component CVH levels, APOs, and other study  
149 outcomes. Low nicotine exposure, BMI, blood glucose, and BP CVH levels were positively  
150 associated with APOs. Low sleep health CVH levels, which was newly considered in LE8,

151 were positively associated with GDM, SGA, and LBW, while diet and PA CVH were largely  
152 unrelated to the study outcomes. Low BMI, blood lipids, blood glucose, and BP CVH levels  
153 tended to be positively associated with the study outcomes, except that low BMI and blood  
154 lipids CVH levels were negatively associated with SGA and LBW.

155 Subgroup analyses of psychological distress, social isolation, and income  
156 demonstrated that low overall CVH levels had a stronger association with APOs in socially  
157 isolated participants ( $P$  for interaction = 0.180). OR for APOs was 2.40 (95% CI: 1.86–3.10)  
158 in those not socially isolated and 3.38 (95%CI: 2.20–5.18) in socially isolated participants  
159 (Figure 2). Among pregnant women with low CVH levels, the prevalence of APOs at delivery  
160 was higher among socially isolated pregnant women (36.4% vs. 27.4%); however, this  
161 difference was attenuated among pregnant women with high CVH levels (13.6% vs. 13.1%).  
162 Subgroup analyses of each item and subscale of social isolation were conducted,  
163 demonstrating that low overall CVH levels were more associated with APOs in participants  
164 in the low family subscale ( $P$  for interaction = 0.025). For participants with a family subscale  
165 score of  $\geq 6$ , the OR (95% CI) for APOs was 2.45 (1.95–3.09) and 5.15 (2.63–10.10) in  
166 participants with a family subscale score of  $< 6$  (Figure 3). Analyses of each of the LSNS-6  
167 items, on the family and the friend subscale, showed a significant interaction between overall  
168 CVH levels and the “Call for help” item in the family subscale.

169 Sensitivity analyses showed results that were largely consistent with those of the  
170 main analyses (Supplementary Figures 4-6).

171

## 172 **Comment**

### 173 **Principal findings**

174 Low overall CVH levels were associated with a higher prevalence of APOs, PE, GDM, PTB,  
175 LGA, and NICU admission and a lower prevalence of SGA. The association of low overall

176 CVH levels with APOs was stronger for socially isolated pregnant women than for pregnant  
177 women who were not socially isolated. Among the LSNS-6 items and subscales, participants  
178 with low family subscale scores and those who reported having fewer close relatives to whom  
179 they could call for help were more affected by low overall CVH levels.

180

### 181 **Results in the context of what is known**

182 Only one previous study has investigated the relationship between CVH and APOs.<sup>19</sup> The  
183 previous study<sup>19</sup> calculated overall CVH status using only five components and demonstrated  
184 its relationship with PE, unplanned cesarean section, LGA, sum of skinfolds, and insulin  
185 sensitivity. Our results extend these findings and further illustrate the link between overall  
186 CVH -comprising all LE8 components- and other clinical outcomes such as PTB and NICU  
187 admission. In the previous study,<sup>19</sup> high overall CVH levels were positively associated with  
188 SGA, primarily through the BMI component, which was difficult to interpret and led to a  
189 clinical misinterpretation that “high CVH is a risk factor for SGA”. Our study reported  
190 similar results but also showed that a low overall CVH level is a risk factor for APOs and  
191 NICU admission. Comprehensively, our findings lend credence to the integration of CVH in  
192 antenatal care. Furthermore, the association between sleep health, a new component of LE8,  
193 and study outcomes such as GDM, SGA, and LBW suggests that LE8 may be more practical  
194 than LS7.

195 Our study demonstrated a more pronounced association between low overall CVH  
196 levels and APOs in socially isolated pregnant women. Negative social determinants of health,  
197 including social isolation, are well-established risk factors for CVD and mortality in non-  
198 pregnant people<sup>37, 38</sup> and have been identified to influence CVH in pregnant women.<sup>39</sup>  
199 However, the interaction between these factors and CVH remains elusive. Previously, a  
200 study<sup>20</sup> involving middle-aged and older adults, predominantly Europeans, showed that life

201 expectancy was comparable across socioeconomic strata among participants with optimal  
202 CVH but not among those with poor CVH, suggesting that improved CVH could mitigate  
203 health inequalities. Our findings are consistent with previous results indicating that pregnant  
204 women have a similar risk of APOs regardless of their social isolation status when their CVH  
205 improves, underscoring the importance of providing support to this population. Furthermore,  
206 our findings suggest that socially isolated pregnant women, particularly those with limited  
207 family relationships or fewer close relatives to whom they can call for help, may be more  
208 vulnerable to the impact of low CVH. Beyond the general concept of "social isolation," it  
209 may be necessary to consider the specific social conditions of pregnant women.

210         Notably, psychosocial distress during pregnancy did not significantly modify the  
211 effect of CVH, suggesting that psychological distress and CVH were additively related to  
212 APOs. Previous studies have reported a bidirectional relationship between CVH and  
213 psychological status, identifying maternal psychological distress as a possible risk factor for  
214 poor CVH during pregnancy.<sup>40</sup> Also, improvements in CVH from early pregnancy to 6  
215 months postpartum have been linked to reduced postpartum depressive symptoms.<sup>41</sup>  
216 Psychological distress has been found to be associated with APOs.<sup>42, 43</sup> Therefore, a  
217 simultaneous assessment and consideration of both aspects in clinical practice is  
218 recommended.

219

## 220 **Clinical implications**

221 Assessment of CVH as undertaken by our study has potential implications for clinical  
222 practice. Importantly, there is a need to adopt a comprehensive approach to health assessment  
223 rather than focusing solely on a specific aspect of health status. Utilizing an index of overall  
224 CVH instead of a single CVH component enables clinicians to address complex interactions  
225 among risk factors, such as smoking cessation that may lead obesity or exercise habits that

226 may impact the duration of sleep. Particularly for socially isolated pregnant women who  
227 demonstrated a heightened vulnerability to low CVH in this study, prioritized access to  
228 primary care, lifestyle education, and access to pharmacotherapies is essential. Regardless of  
229 social isolation status, the risk of APOs was consistently low in the group with high CVH  
230 levels, suggesting that increasing CVH levels in pregnant women may reduce health  
231 disparities.

232

### 233 **Research implications**

234 Considering the correlation between CVH before and during pregnancy,<sup>44</sup> incorporating LE8  
235 in conception planning may aid in preventing future APOs. LE8 advocates improvements by  
236 lifestyle modification or the use of pharmacotherapy, empowering women to proactively  
237 enhance their CVH in preparation for pregnancy. Therefore, we hope that further study will  
238 reveal the relationship between pre-conception CVH status and APOs

239

### 240 **Strength and limitations**

241 To the best of our knowledge, this study represents the first endeavor to investigate the  
242 association between CVH assessed by LE8 and APOs. Notably, our study population was  
243 approximately five times larger than that in a prior study<sup>19</sup> that assessed CVH using LS7. One  
244 strength of this study lies in the inclusion of pregnancy outcomes, providing a comprehensive  
245 assessment of the clinical importance of CVH. Also, our sensitivity analyses reinforced the  
246 robustness of the results.

247 Despite these strengths, our study had some limitations. First, the timing of CVH  
248 measurements varied among participants, although all assessments, including questionnaires,  
249 blood pressure measurements, and blood samples, were conducted during pregnancy.

250 Consequently, the point at which CVH is most strongly associated with APOs remains

251 unclear. Second, the course of pregnancy may influence behavior during pregnancy,  
252 introducing the possibility of reverse causation. Sensitivity analyses in participants with  
253 blood samples collected before or at 20 weeks showed results consistent with those of the  
254 main analyses, suggesting limited reverse causality related to glucose and lipid status.  
255 However, the effects of other conditions, such as PE diagnosis and fetal growth restriction,  
256 remain uncertain. Finally, the validity of the LE8 in the Japanese population has not yet been  
257 established. Population differences and variations in LE8 definition, such as the use of the 8-  
258 item Japanese Diet Index vs. the 16 items of Mediterranean Eating Pattern for Americans,  
259 may impact the accurate assessment of CVH by LE8.

260

## 261 **Conclusion**

262 In conclusion, CVH status may be a useful index for evaluating the risk of APOs.

263 Socially isolated pregnant women are more vulnerable to the effects of low CVH status.

264



265 **Acknowledgements**

266 The authors would like to thank all the participants who consented to participate in this study  
267 and all the staff at Tohoku Medical Megabank Organization, Tohoku University, Iwate  
268 Tohoku Medical Megabank Organization, and Iwate Medical University.  
269 A full list of the members of the Tohoku Medical Megabank Organization is available at  
270 <https://www.megabank.tohoku.ac.jp/english/a230901/>.

271

272 **Authors' contributions**

273 Conceptualization: Hisashi Ohseto, Mami Ishikuro, Geng Chen, Ippei Takahashi  
274 Methodology: Hisashi Ohseto, Mami Ishikuro  
275 Visualization: Hisashi Ohseto  
276 Supervision: Shinichi Kuriyama, Taku Obara  
277 Writing – original draft: Hisashi Ohseto, Mami Ishikuro, Geng Chen, Ippei Takahashi  
278 Writing – review & editing: All the authors

279

280 **Data Sharing Statement**

281 Individual data are available upon request after the approval of the Ethical Committee and the  
282 Materials and Information Distribution Review Committee of Tohoku Medical Megabank  
283 Organization.

284

285

286

287

288

289 **References**

- 290 1. Freaney PM, Harrington K, Molsberry R, et al. Temporal trends in adverse  
291 pregnancy outcomes in birthing individuals aged 15 to 44 years in the United States, 2007 to  
292 2019. *J Am Heart Assoc* 2022;11:e025050.
- 293 2. Shah NS, Wang MC, Freaney PM, et al. Trends in gestational diabetes at first live  
294 birth by race and ethnicity in the US, 2011-2019. *JAMA* 2021;326:660-9.
- 295 3. Sederholm Lawesson S, Swahn E, et al. Association between history of adverse  
296 pregnancy outcomes and coronary artery disease assessed by coronary computed tomography  
297 angiography. *JAMA* 2023;329:393-404.
- 298 4. Al Khalaf S, Chappell LC, Khashan AS, McCarthy FP, O'Reilly EJ. Association  
299 between chronic hypertension and the risk of 12 cardiovascular diseases among parous  
300 women: The role of adverse pregnancy outcomes. *Hypertension* 2023;80:1427-38.
- 301 5. Parikh NI, Gonzalez JM, Anderson CAM, et al. Adverse pregnancy outcomes and  
302 cardiovascular disease risk: Unique opportunities for cardiovascular disease prevention in  
303 women: A scientific statement from the American Heart Association. *Circulation*  
304 2021;143:e902-16.
- 305 6. Hinkle SN, Schisterman EF, Liu D, et al. Pregnancy complications and long-term  
306 mortality in a diverse cohort. *Circulation* 2023;147:1014-25.
- 307 7. Magee LA, Nicolaides KH, von Dadelszen P. Preeclampsia. *N Engl J Med*  
308 2022;386:1817-32.
- 309 8. McIntyre HD, Catalano P, Zhang C, Desoye G, Mathiesen ER, Damm P. Gestational  
310 diabetes mellitus. *Nat Rev Dis Primers* 2019;5:47.
- 311 9. Brown HL, Warner JJ, Gianos E, et al. Promoting risk identification and reduction of  
312 cardiovascular disease in women through collaboration with obstetricians and gynecologists:  
313 A presidential advisory from the American Heart Association and the American College of

- 314 Obstetricians and Gynecologists. *Circulation* 2018;137:e843-52.
- 315 10. Marchi J, Berg M, Dencker A, Olander EK, Begley C. Risks associated with obesity  
316 in pregnancy, for the mother and baby: A systematic review of reviews. *Obes Rev*  
317 2015;16:621-38.
- 318 11. Lu Q, Zhang X, Wang Y, et al. Sleep disturbances during pregnancy and adverse  
319 maternal and fetal outcomes: A systematic review and meta-analysis. *Sleep Med Rev*  
320 2021;58:101436.
- 321 12. Makarem N, Chau K, Miller EC, et al. Association of a Mediterranean diet pattern  
322 with adverse pregnancy outcomes among US women. *JAMA Netw Open* 2022;5:e2248165.
- 323 13. Lloyd-Jones DM, Allen NB, Anderson CAM, et al. Life's Essential 8: Updating and  
324 enhancing the American Heart Association's construct of cardiovascular health: A presidential  
325 advisory from the American Heart Association. *Circulation* 2022;146:e18-43.
- 326 14. Xia X, Chen S, Tian X, et al. Association of cardiovascular health assessed by the  
327 new life's essential 8 metrics with years lived without cardiovascular disease. *J Am Heart*  
328 *Assoc* 2023;12:e029241.
- 329 15. Li X, Ma H, Wang X, Feng H, Qi L. Life's essential 8, genetic susceptibility, and  
330 incident cardiovascular disease: A prospective study. *Arterioscler Thromb Vasc Biol*  
331 2023;43:1324-33.
- 332 16. Fang N, Jiang M, Fan Y. Ideal cardiovascular health metrics and risk of  
333 cardiovascular disease or mortality: A meta-analysis. *Int J Cardiol* 2016;214:279-83.
- 334 17. Perak AM, Ning H, Khan SS, et al. Associations of late adolescent or young adult  
335 cardiovascular health with premature cardiovascular disease and mortality. *J Am Coll Cardiol*  
336 2020;76:2695-707.
- 337 18. Bush T, Lovejoy JC, Deprey M, Carpenter KM. The effect of tobacco cessation on  
338 weight gain, obesity, and diabetes risk. *Obesity (Silver Spring)* 2016;24:1834-41.

- 339 19. Perak AM, Lancki N, Kuang A, et al. Associations of gestational cardiovascular  
340 health with pregnancy outcomes: The hyperglycemia and adverse pregnancy outcome study.  
341 Am J Obstet Gynecol 2021;224:210.e1-e17.
- 342 20. Wang X, Ma H, Li X, et al. Association of cardiovascular health with life expectancy  
343 free of cardiovascular disease, diabetes, cancer, and dementia in UK adults. JAMA Intern  
344 Med 2023;183:340-9.
- 345 21. Agarwala A, Patel J, Stephens J, et al. Implementation of prevention science to  
346 eliminate health care inequities in achieving cardiovascular health: A scientific statement  
347 from the American Heart Association. Circulation 2023;148:1183-93.
- 348 22. van Sloten TT, Valentin E, Climie RE, et al. Association of cardiovascular health  
349 with risk of clinically relevant depressive symptoms. JAMA Psychiatry 2023;80:342-9.
- 350 23. Patterson SL, Marcus M, Goetz M, Vaccarino V, Gooding HC. Depression and  
351 anxiety are associated with cardiovascular health in young adults. J Am Heart Assoc  
352 2022;11:e027610.
- 353 24. Cene CW, Beckie TM, Sims M, et al. Effects of objective and perceived social  
354 isolation on cardiovascular and brain health: A scientific statement from the American Heart  
355 Association. J Am Heart Assoc 2022;11:e026493.
- 356 25. Kuriyama S, Metoki H, Kikuya M, et al. Cohort profile: Tohoku Medical Megabank  
357 project birth and three-generation cohort study (TMM BirThree Cohort Study): rationale,  
358 progress and perspective. Int J Epidemiol 2020;49:18-19m.
- 359 26. Kuriyama S, Yaegashi N, Nagami F, et al. The Tohoku Medical Megabank Project:  
360 Design and Mission. J Epidemiol 2016;26:493-511.
- 361 27. Perak AM, Lancki N, Kuang A, et al. Associations of maternal cardiovascular health  
362 in pregnancy with offspring cardiovascular health in early adolescence. JAMA 2021;325:658-  
363 68.

- 364 28. Shimazu T, Kuriyama S, Hozawa A, et al. Dietary patterns and cardiovascular  
365 disease mortality in Japan: A prospective cohort study. *Int J Epidemiol* 2007;36:600-9.
- 366 29. Matsuyama S, Sawada N, Tomata Y, et al. Association between adherence to the  
367 Japanese diet and all-cause and cause-specific mortality: the Japan Public Health Center-  
368 based Prospective Study. *Eur J Nutr* 2021;60:1327-36.
- 369 30. Ogawa K, Jwa SC, Kobayashi M, Morisaki N, Sago H, Fujiwara T. Validation of a  
370 food frequency questionnaire for Japanese pregnant women with and without nausea and  
371 vomiting in early pregnancy. *J Epidemiol* 2017;27:201-8.
- 372 31. Fraser A, Nelson SM, Macdonald-Wallis C, et al. Associations of pregnancy  
373 complications with calculated cardiovascular disease risk and cardiovascular risk factors in  
374 middle age: The avon longitudinal study of parents and children. *Circulation* 2012;125:1367-  
375 80.
- 376 32. ACOG Committee on Practice Bulletin—Obstetrics. ACOG practice bulletin.  
377 Diagnosis and management of preeclampsia and eclampsia. Number 33, January 2002. *J*  
378 *Obstet Gynaecol* 2002;99:159-67.
- 379 33. Kessler RC, Andrews G, Colpe LJ, et al. Short screening scales to monitor  
380 population prevalences and trends in non-specific psychological distress. *Psychol Med*  
381 2002;32:959-76.
- 382 34. Lubben J, Blozik E, Gillmann G, et al. Performance of an abbreviated version of the  
383 Lubben social network scale among three European community-dwelling older adult  
384 populations. *Gerontologist* 2006;46:503-13.
- 385 35. Greenland S, Finkle WD. A critical look at methods for handling missing covariates  
386 in epidemiologic regression analyses. *Am J Epidemiol* 1995;142:1255-64.
- 387 36. van Buuren S, Groothuis-Oudshoorn K. Mice: Multivariate imputation by chained  
388 equations in R. *J Stat Softw* 2011;45:1-67.

- 389 37. Golaszewski NM, LaCroix AZ, Godino JG, et al. Evaluation of social isolation,  
390 loneliness, and cardiovascular disease among older women in the US. *JAMA Netw Open*  
391 2022;5:e2146461.
- 392 38. Steptoe A, Shankar A, Demakakos P, Wardle J. Social isolation, loneliness, and all-  
393 cause mortality in older men and women. *Proc Natl Acad Sci U S A* 2013;110:5797-801.
- 394 39. Sharma G, Grandhi GR, Acquah I, et al. Social determinants of suboptimal  
395 cardiovascular health among pregnant women in the United States. *J Am Heart Assoc*  
396 2022;11:e022837.
- 397 40. Boyer TM, Avula V, Minhas AS, Vaught AJ, Sharma G, Gemmill A. Psychosocial  
398 stressors as a determinant of maternal cardiovascular health during pregnancy. *Am J Cardiol*  
399 2023;201:302-7.
- 400 41. Donofry SD, Jouppi RJ, Call CC, Conlon RPK, Levine MD. Improvements in  
401 cardiovascular health over the perinatal period predicts lower postpartum psychological  
402 distress. *medRxiv [Preprint]* 2023:2023.12.22.23300475.
- 403 42. Caparros-Gonzalez RA, Lynn F, Alderdice F, Peralta-Ramirez MI. Cortisol levels  
404 versus self-report stress measures during pregnancy as predictors of adverse infant outcomes:  
405 a systematic review. *Stress* 2022;25:189-212.
- 406 43. Traylor CS, Johnson JD, Kimmel MC, Manuck TA. Effects of psychological stress  
407 on adverse pregnancy outcomes and nonpharmacologic approaches for reduction: an expert  
408 review. *Am J Obstet Gynecol MFM* 2020;2:100229.
- 409 44. Harville EW, Crook CE, Bazzano LA, et al. Cardiovascular risk factors before and  
410 during pregnancy: Does pregnancy unmask or initiate risk? *J Obstet Gynaecol Res*  
411 2021;47:3849-56.

412 **Table 1. Baseline characteristics of the complete cases in the TMM BirThree Cohort**

413 **Study by overall CVH levels**

|                                   | High overall<br>CVH<br>n = 2,891 | Moderate<br>overall CVH<br>n = 11,498 | Low overall<br>CVH<br>n = 541 | P-value |
|-----------------------------------|----------------------------------|---------------------------------------|-------------------------------|---------|
| <b>Advanced maternal age at</b>   |                                  |                                       |                               |         |
| conception, %                     | 655 (22.7)                       | 3,092 (26.9)                          | 177 (32.7)                    | <0.001  |
| Low income, %                     | 875 (30.3)                       | 4,237 (36.8)                          | 269 (49.7)                    | <0.001  |
| <b>Alcohol consumption during</b> |                                  |                                       |                               |         |
| pregnancy, %                      | 590 (20.4)                       | 2,303 (20.0)                          | 81 (15.0)                     | 0.012   |
| Psychological distress, %         | 225 (7.8)                        | 1,237 (10.8)                          | 100 (18.5)                    | <0.001  |
| Social isolation, %               | 470 (16.3)                       | 2,286 (19.9)                          | 154 (28.5)                    | <0.001  |
| Conception via IVF, %             | 110 (3.8)                        | 611 (5.3)                             | 33 (6.1)                      | 0.002   |
| Primipara, %                      | 964 (33.3)                       | 4,698 (40.9)                          | 224 (41.4)                    | <0.001  |
| GA at blood sampling, day         | 125.8 ± 30.2                     | 138.3 ± 33.7                          | 147.8 ± 34.6                  | <0.001  |
| GA at BP measurement, day         | 79.2 ± 14.8                      | 79.4 ± 15.4                           | 81.4 ± 14.8                   | 0.006   |
| <b>CVH scores</b>                 |                                  |                                       |                               |         |
| Overall CVH score                 | 85.0 ± 4.4                       | 67.7 ± 7.3                            | 44.4 ± 5.0                    | <0.001  |
| Diet score                        | 69.9 ± 26.3                      | 44.2 ± 32.5                           | 22.7 ± 27.5                   | <0.001  |
| PA score                          | 59.0 ± 45.3                      | 16.7 ± 34.7                           | 6.0 ± 21.9                    | <0.001  |
| Nicotine exposure score           | 88.3 ± 21.0                      | 69.3 ± 33.8                           | 33.2 ± 34.2                   | <0.001  |
| Sleep health score                | 83.5 ± 21.2                      | 71.2 ± 26.6                           | 48.5 ± 29.9                   | <0.001  |
| BMI score                         | 96.9 ± 11.3                      | 85.8 ± 26.2                           | 42.4 ± 32.6                   | <0.001  |
| Blood lipids score                | 86.0 ± 22.5                      | 65.9 ± 29.3                           | 42.2 ± 26.2                   | <0.001  |
| Blood glucose score               | 99.8 ± 2.5                       | 99.3 ± 5.9                            | 93.6 ± 17.4                   | <0.001  |

|          |             |             |             |        |
|----------|-------------|-------------|-------------|--------|
| BP score | 96.5 ± 10.5 | 89.3 ± 18.6 | 66.9 ± 26.6 | <0.001 |
|----------|-------------|-------------|-------------|--------|

---

414 CVH, cardiovascular health; IVF, in vitro fertilization; GA, gestational age; BP, blood

415 pressure; PA, physical activity; BMI, body mass index.

416 The overall CVH score was used to categorize participants into three groups: high (80–100),  
417 moderate (50–79), and low (0–49).

418 Data are shown as mean ± standard deviation for continuous variables and n (%) for  
419 categorical variables.

420 P-values were calculated using analysis of variance for continuous variables and the chi-  
421 square test for categorical variables.



422 **Table 2. Results of logistic regression analyses showing association between overall CVH levels and study outcomes**

|      | CVH levels | Crude                 |         |             | Adjusted             |         |             |
|------|------------|-----------------------|---------|-------------|----------------------|---------|-------------|
|      |            | OR (95% CI)           | P-value | P for trend | OR (95% CI)          | P-value | P for trend |
| APOs | High       | Reference             |         | <0.001      | Reference            |         | <0.001      |
|      | Moderate   | 1.20 (1.07 to 1.36)   | 0.002   |             | 1.17 (1.04 to 1.32)  | 0.009   |             |
|      | Low        | 2.82 (2.28 to 3.50)   | <0.001  |             | 2.64 (2.13 to 3.27)  | <0.001  |             |
| PE   | High       | Reference             |         | <0.001      | Reference            |         | <0.001      |
|      | Moderate   | 2.06 (1.54 to 2.74)   | <0.001  |             | 1.94 (1.46 to 2.59)  | <0.001  |             |
|      | Low        | 8.19 (5.69 to 11.81)  | <0.001  |             | 7.43 (5.13 to 10.76) | <0.001  |             |
| GDM  | High       | Reference             |         | <0.001      | Reference            |         | <0.001      |
|      | Moderate   | 2.25 (1.55 to 3.25)   | <0.001  |             | 2.18 (1.51 to 3.15)  | <0.001  |             |
|      | Low        | 10.11 (6.47 to 15.80) | <0.001  |             | 9.18 (5.83 to 14.44) | <0.001  |             |
| PTB  | High       | Reference             |         | <0.001      | Reference            |         | 0.002       |
|      | Moderate   | 1.27 (1.03 to 1.56)   | 0.028   |             | 1.24 (1.00 to 1.53)  | 0.047   |             |
|      | Low        | 2.06 (1.41 to 2.99)   | <0.001  |             | 1.93 (1.32 to 2.82)  | <0.001  |             |
| SGA  | High       | Reference             |         | 0.025       | Reference            |         | 0.017       |

|                |          |                     |        |  |                     |        |
|----------------|----------|---------------------|--------|--|---------------------|--------|
|                | Moderate | 0.84 (0.71 to 0.98) | 0.028  |  | 0.83 (0.71 to 0.98) | 0.024  |
|                | Low      | 0.77 (0.52 to 1.13) | 0.178  |  | 0.74 (0.50 to 1.09) | 0.125  |
| LGA            | High     | Reference           | <0.001 |  | Reference           | <0.001 |
|                | Moderate | 1.29 (1.11 to 1.50) | <0.001 |  | 1.26 (1.09 to 1.46) | 0.002  |
|                | Low      | 2.73 (2.12 to 3.51) | <0.001 |  | 2.63 (2.04 to 3.40) | <0.001 |
| LBW            | High     | Reference           | 0.743  |  | Reference           | 0.876  |
|                | Moderate | 1.02 (0.88 to 1.19) | 0.791  |  | 0.99 (0.85 to 1.15) | 0.899  |
|                | Low      | 1.05 (0.75 to 1.47) | 0.781  |  | 0.98 (0.70 to 1.37) | 0.894  |
| NICU admission | High     | Reference           | <0.001 |  | Reference           | 0.001  |
|                | Moderate | 1.35 (1.09 to 1.68) | 0.007  |  | 1.30 (1.04 to 1.61) | 0.020  |
|                | Low      | 2.05 (1.39 to 3.02) | <0.001 |  | 1.88 (1.27 to 2.78) | 0.002  |

423 CVH, cardiovascular health; APOs, adverse pregnancy outcomes; OR, odds ratio; CI, confidence interval; PE, preeclampsia; GDM, gestational  
 424 diabetes mellitus; PTB, preterm birth; SGA, small for gestational age; LGA, large for gestational age; LBW, low birth weight; NICU, neonatal  
 425 intensive care unit.

426 ORs and 95% CIs were estimated using logistic regression analyses with high CVH levels as reference.

427 Maternal age at conception, alcohol consumption during pregnancy, conception via in vitro fertilization, parity, psychological distress during

428 pregnancy, social isolation during pregnancy, and household income were included in the adjusted models.

429 **Figure Legends**

430 **Figure 1. Heatmap showing associations between component CVH levels and study**  
431 **outcomes.**

432 The heatmap represents Log transformed ORs from multiple logistic regression analyses  
433 between component CVH levels and study outcomes. Adjustments were made for maternal  
434 age at conception, alcohol consumption during pregnancy, conception via in vitro  
435 fertilization, parity, psychological distress during pregnancy, social isolation during  
436 pregnancy, and household income.

437 High CVH levels were references. Red, blue, and grey indicate positive, negative, and no  
438 association, respectively. Darker colors indicate stronger associations. The asterisk indicates  
439 the p-value.

440 For clarity, extreme Log OR values are presented as 2 or -2 when their absolute values are 2  
441 or more.

442 CVH, cardiovascular health; OR, odds ratio; PA, physical activity; BMI, body mass index;  
443 BP, blood pressure; APOs, adverse pregnancy outcomes; PE, preeclampsia; GDM, gestational  
444 diabetes mellitus; PTB, preterm birth; SGA, small for gestational age; LGA, large for  
445 gestational age; LBW, low birth weight; NICU, neonatal intensive care unit.

446

447 **Figure 2. Subgroup analyses by psychological distress, social isolation, and income**

448 ORs and 95% CIs were calculated using multiple logistic regression analyses between overall  
449 CVH levels and APOs, with adjustment for maternal age at conception, alcohol consumption  
450 during pregnancy, conception via in vitro fertilization, parity, psychological distress during  
451 pregnancy, social isolation during pregnancy, and household income.

452 The "n/N (%)" indicates the number of cases and the total number in that stratum and its  
453 ratio.

454 CVH: cardiovascular health; OR: odds ratio; CI confidence interval.

455

456 **Figure 3. Subgroup analyses by subscales and each item in LSNS-6**

457 The ORs and 95% CIs were calculated using multiple logistic regression analyses between  
458 overall CVH levels and APOs, with adjustment for maternal age at conception, alcohol  
459 consumption during pregnancy, conception via in vitro fertilization, parity, psychological  
460 distress during pregnancy, social isolation during pregnancy, and household income.

461 The "n/N (%)" indicates the number of cases and the total number in that stratum and its  
462 ratio.

463 The details of LSNS-6 were presented in Supplementary Table 2.

464 LSNS, Lubben Social Network Scale; CVH, cardiovascular health; OR, odds ratio; CI,  
465 confidence interval.

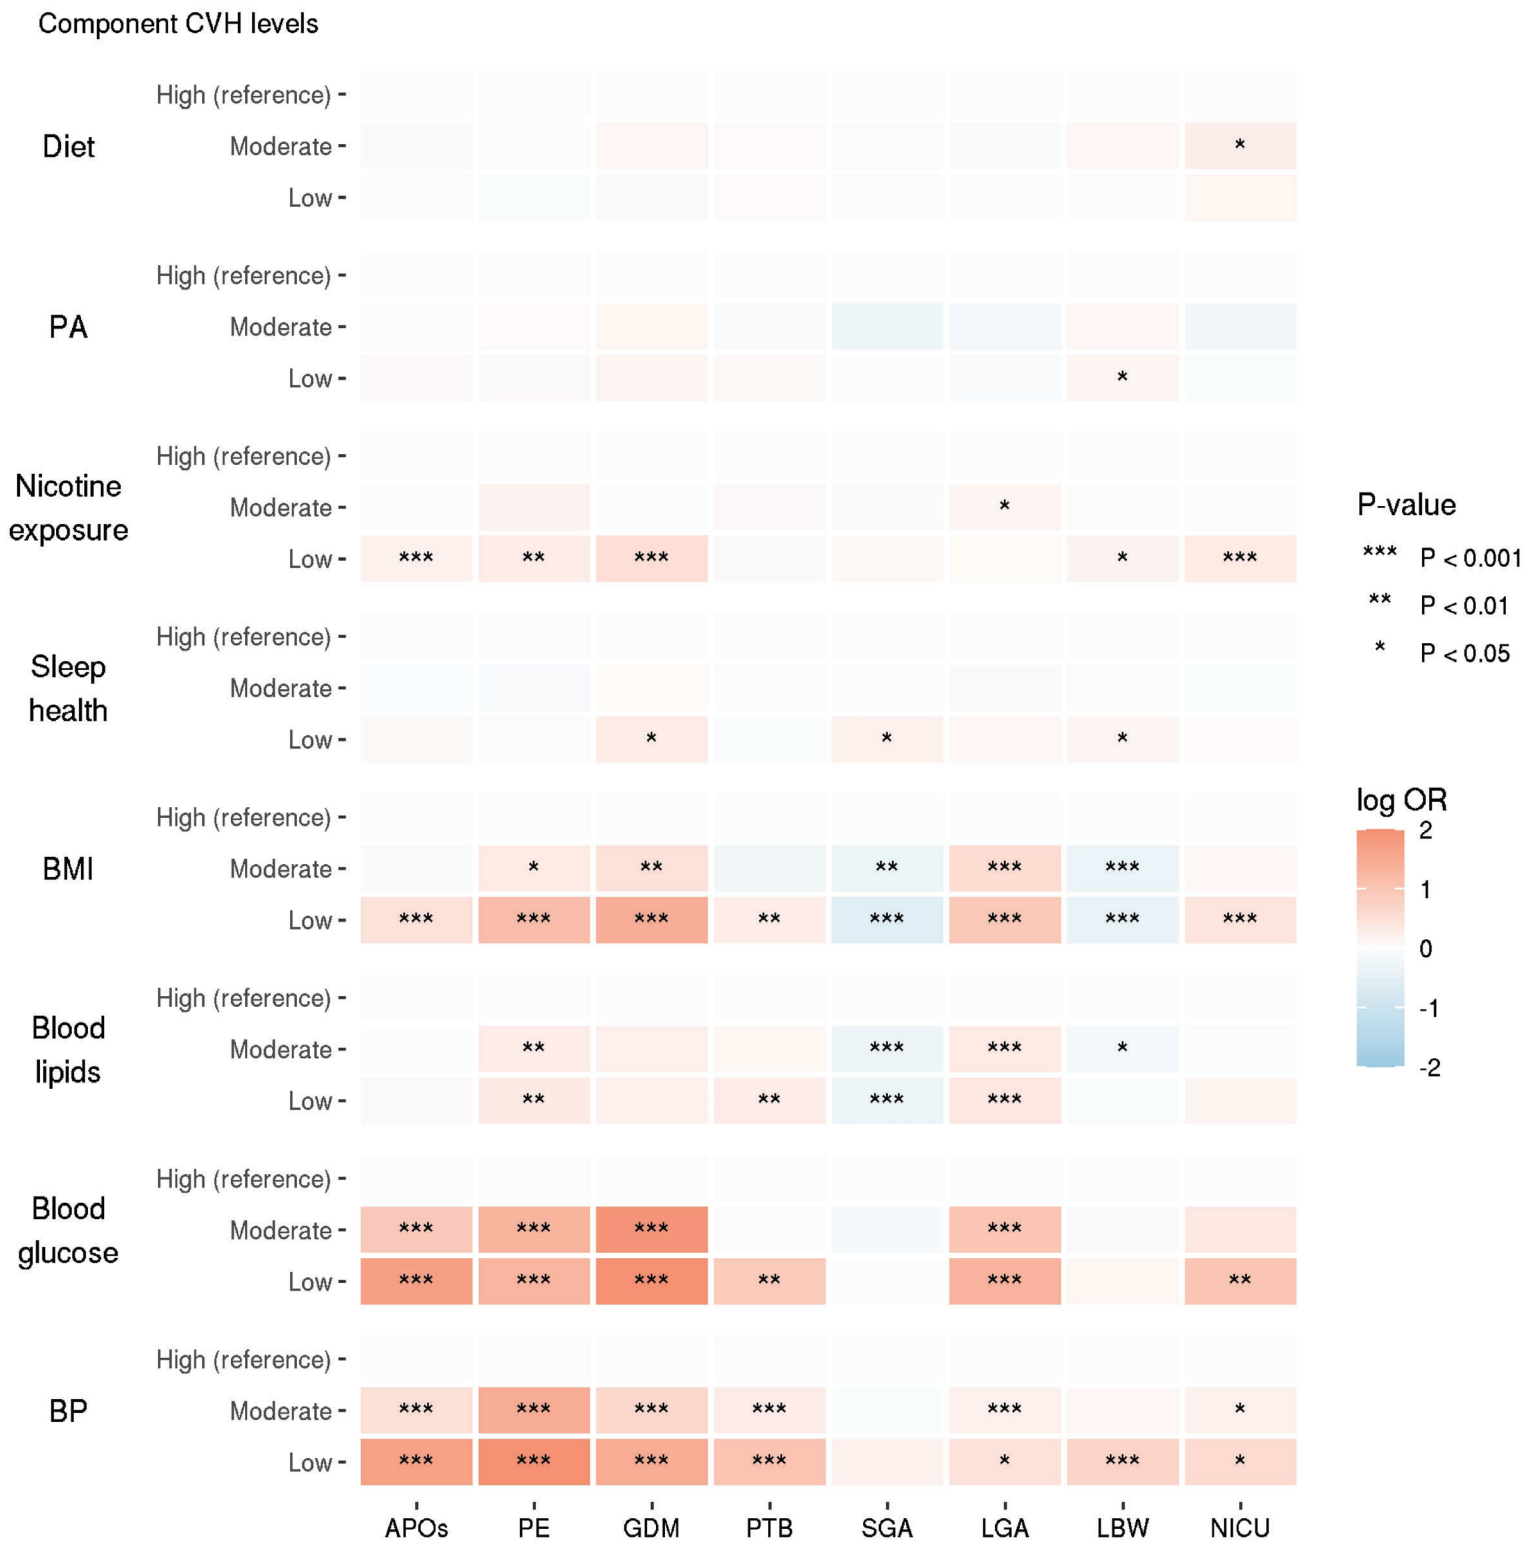

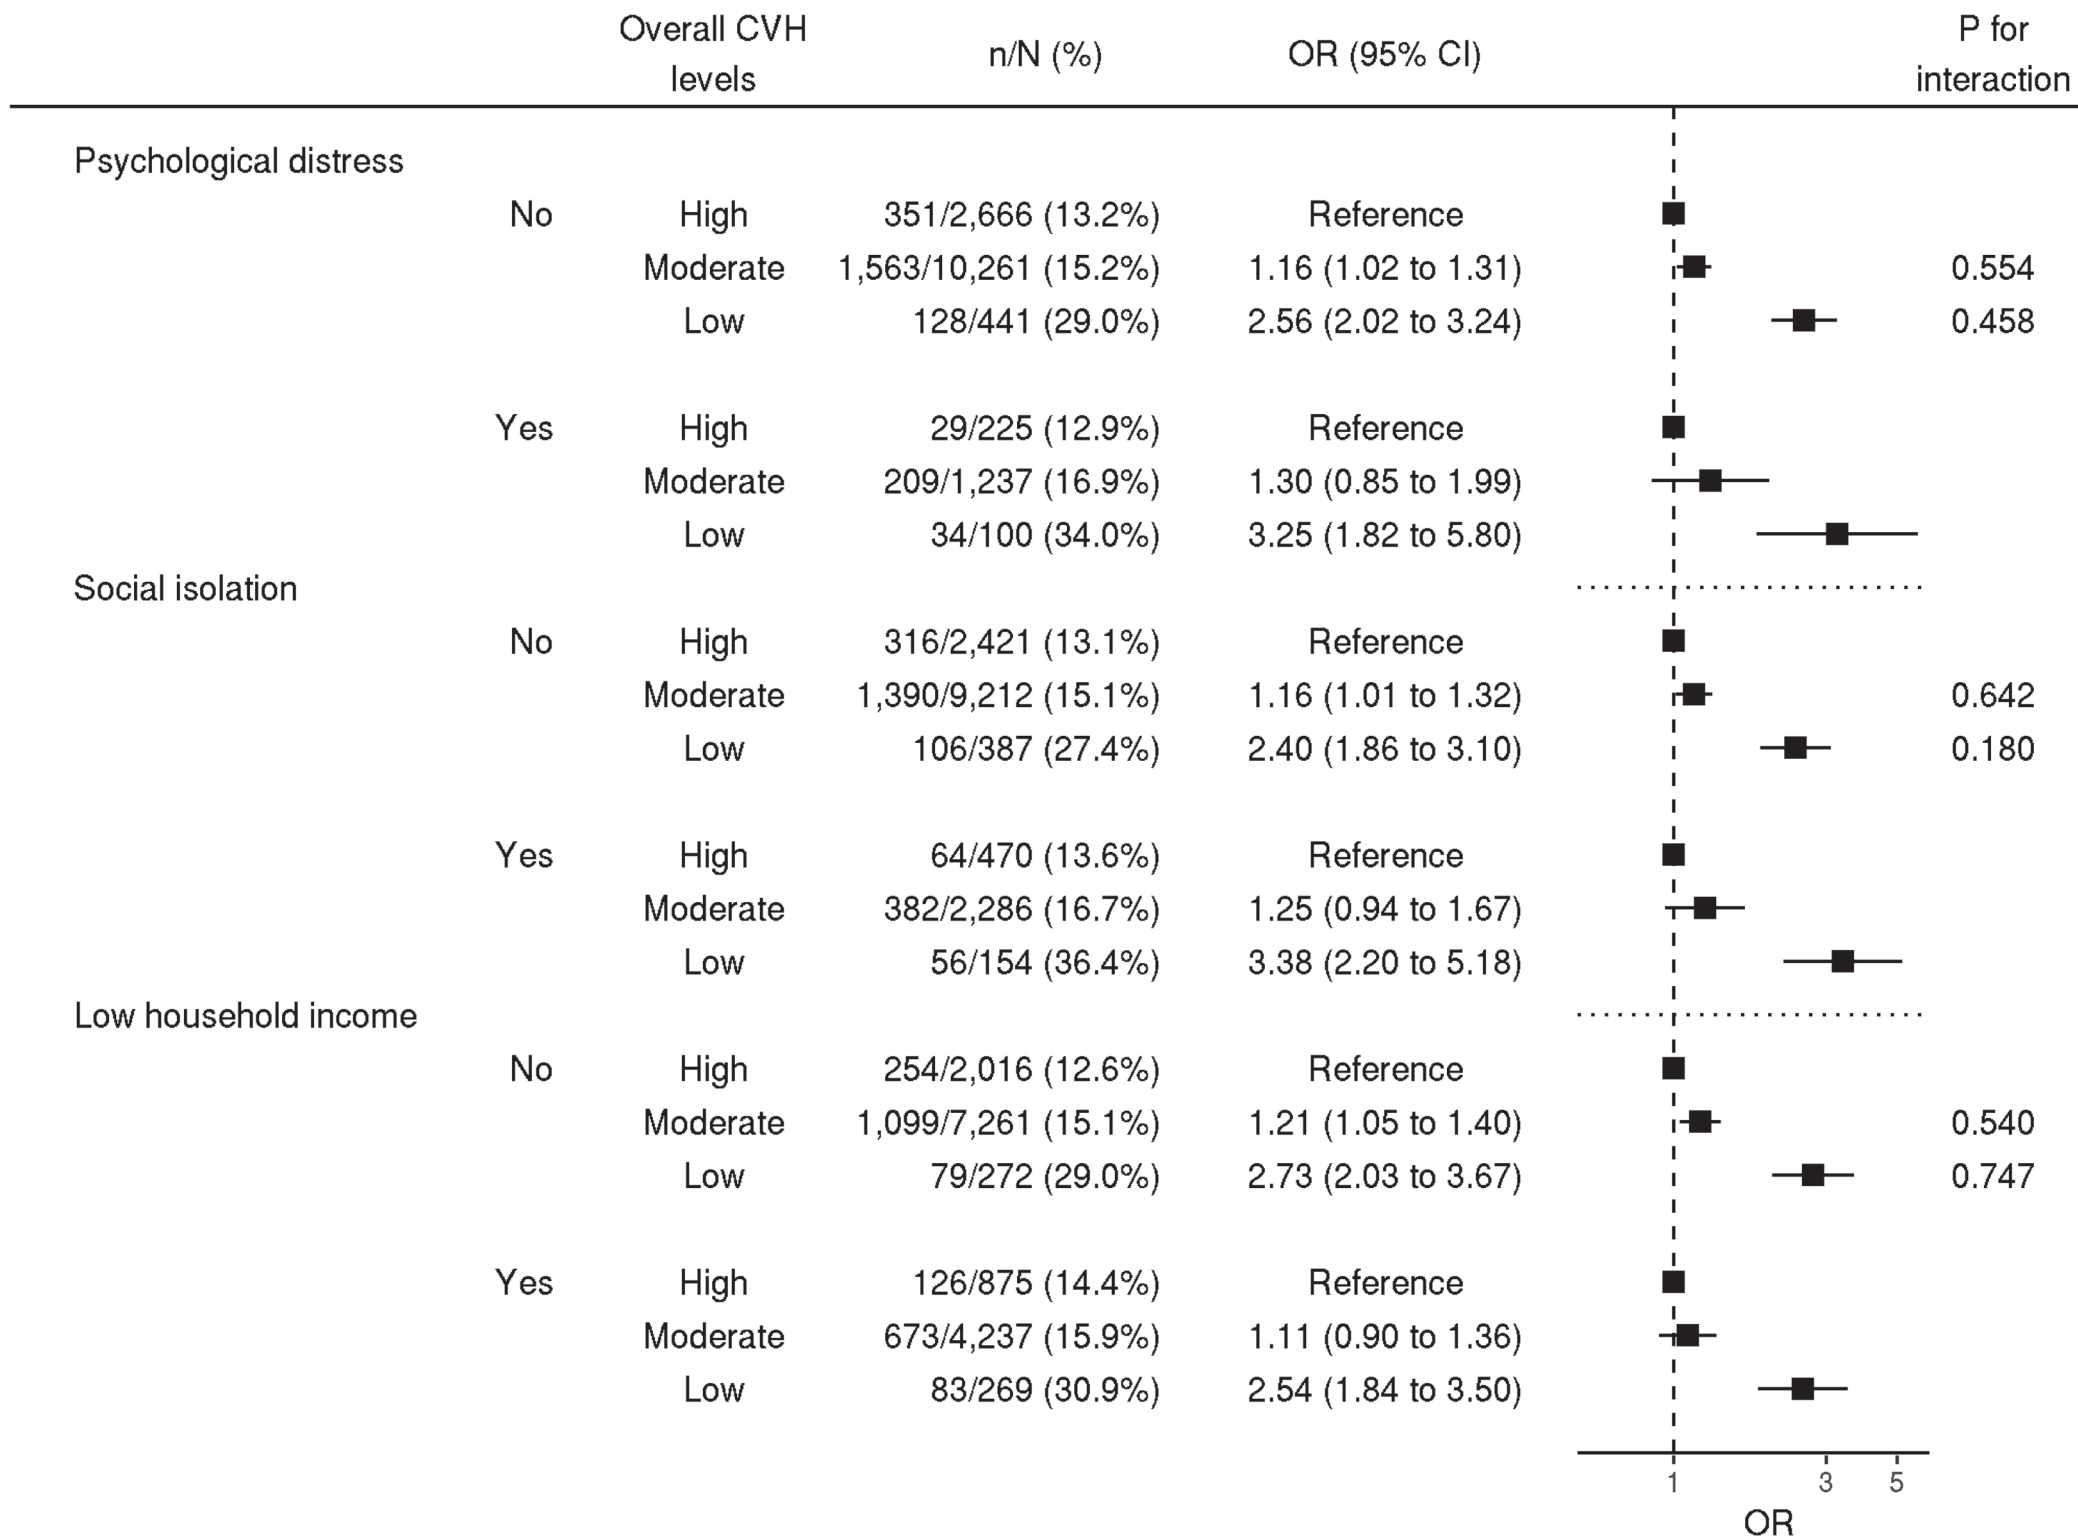

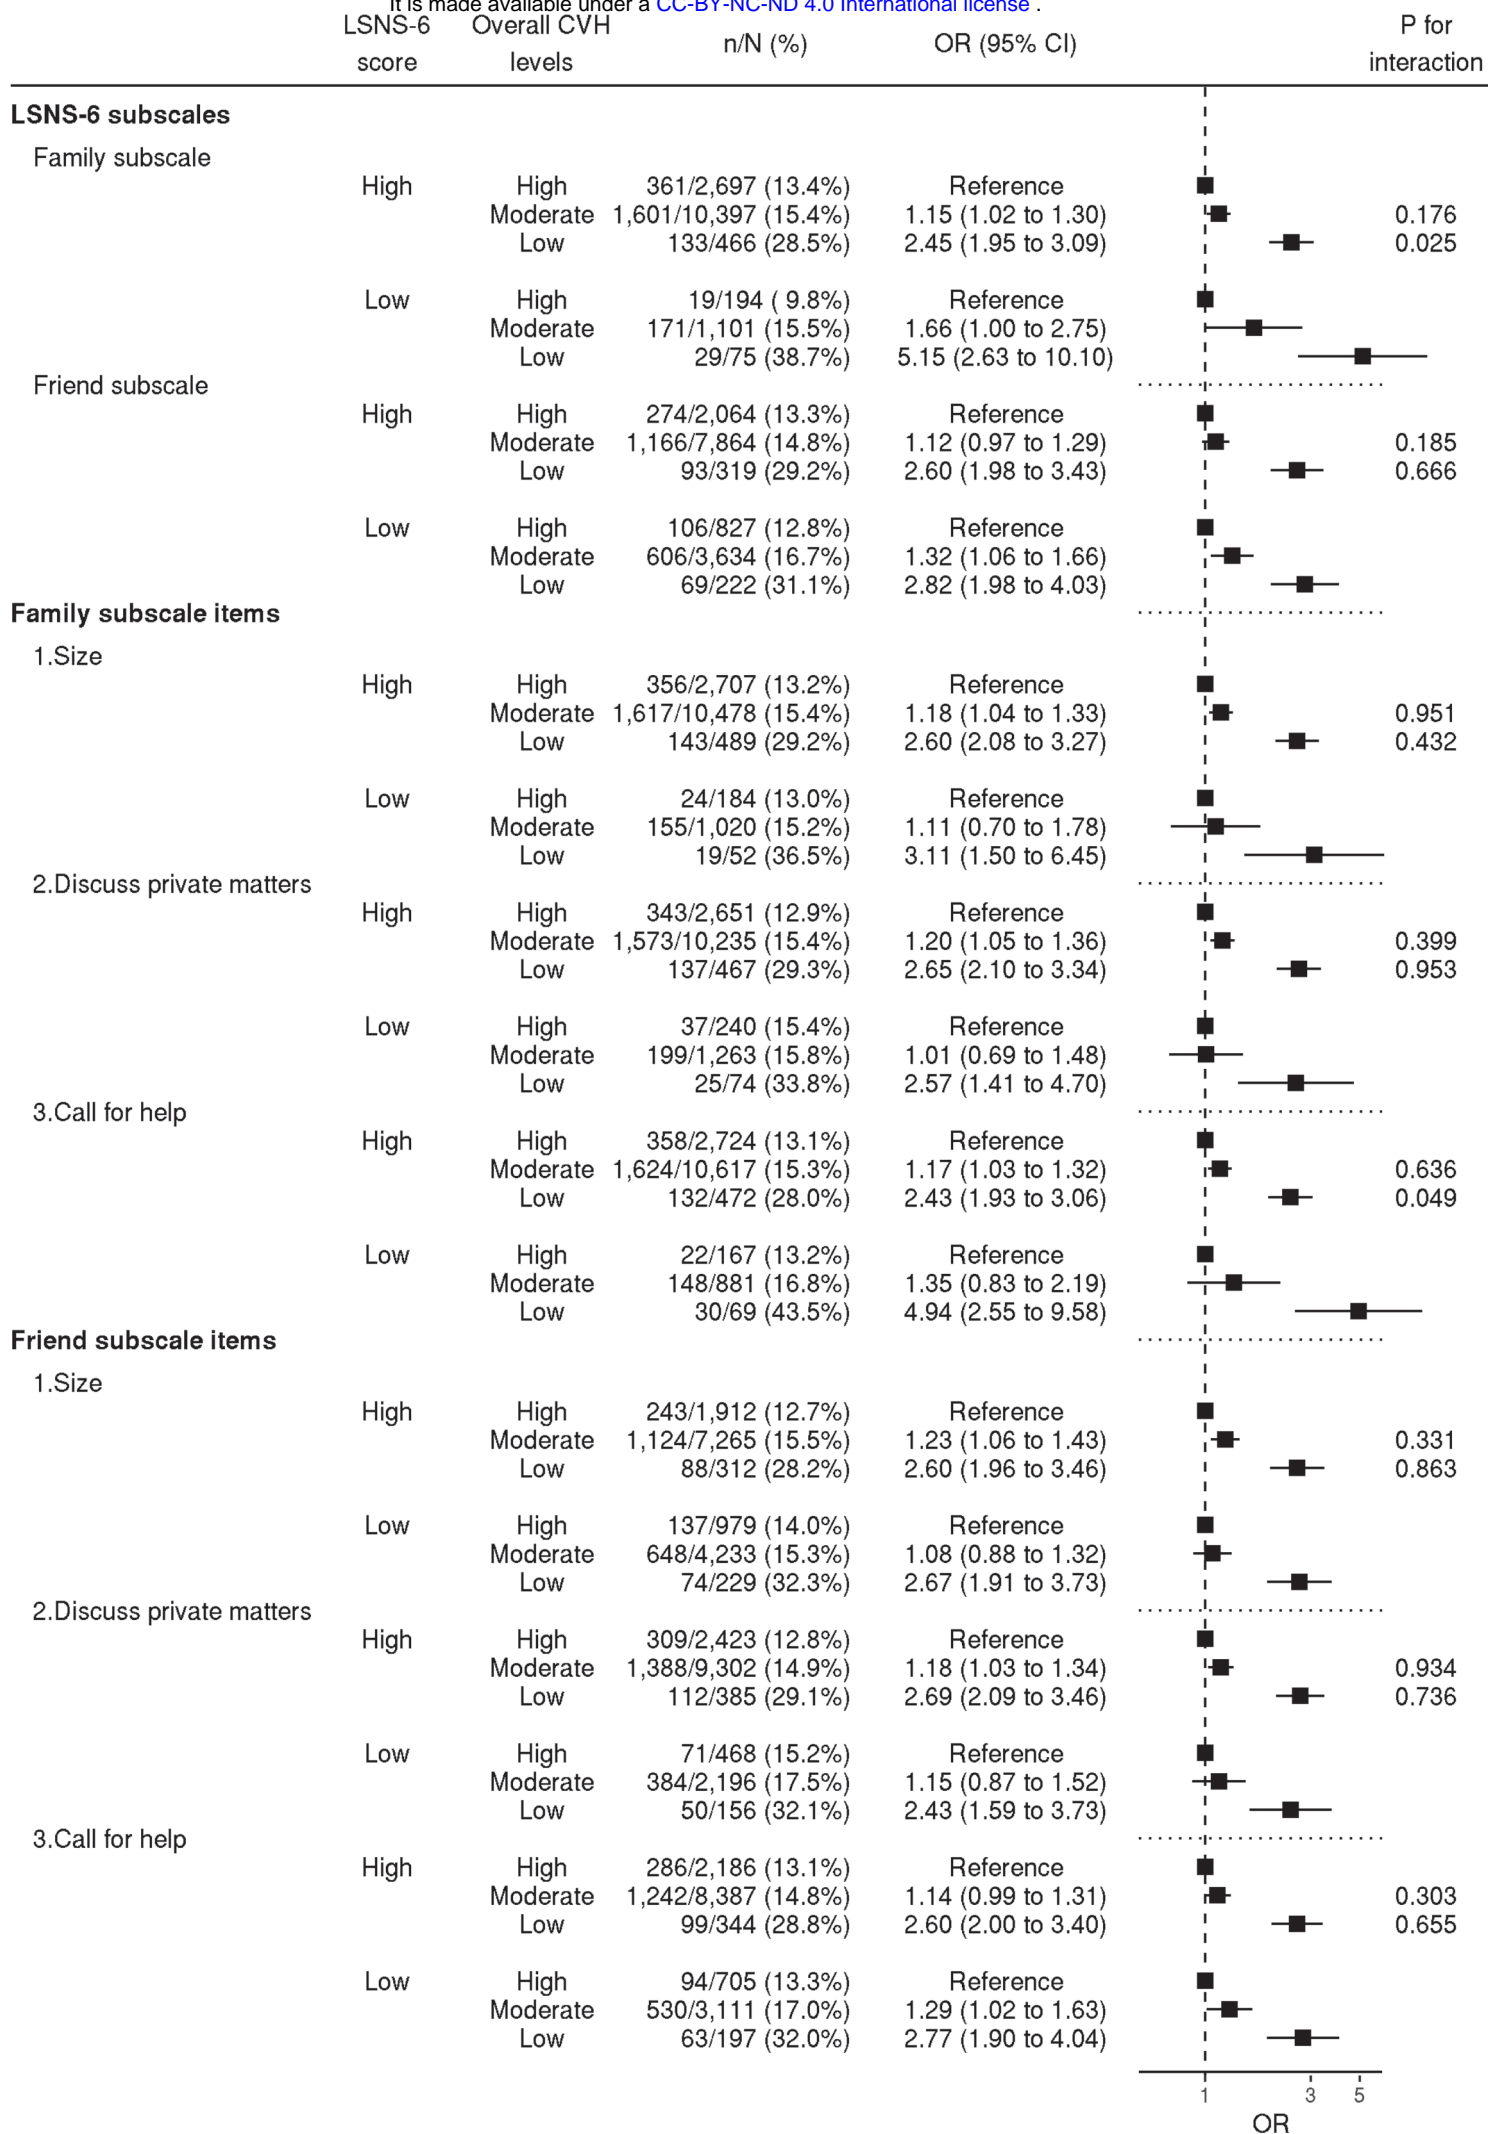

Source: https://medrxiv.org/content/10.1101/2024.07.05.24309978v1.full.pdf
